# Supplementary figures and images for: Oral versus intravenous iron replacement therapy distinctly alters the gut microbiota and metabolome in patients with IBD
Source: HighWire-hosted journal article supplement (doi:10.1136/gutjnl-2015-309940), 2016-02-04

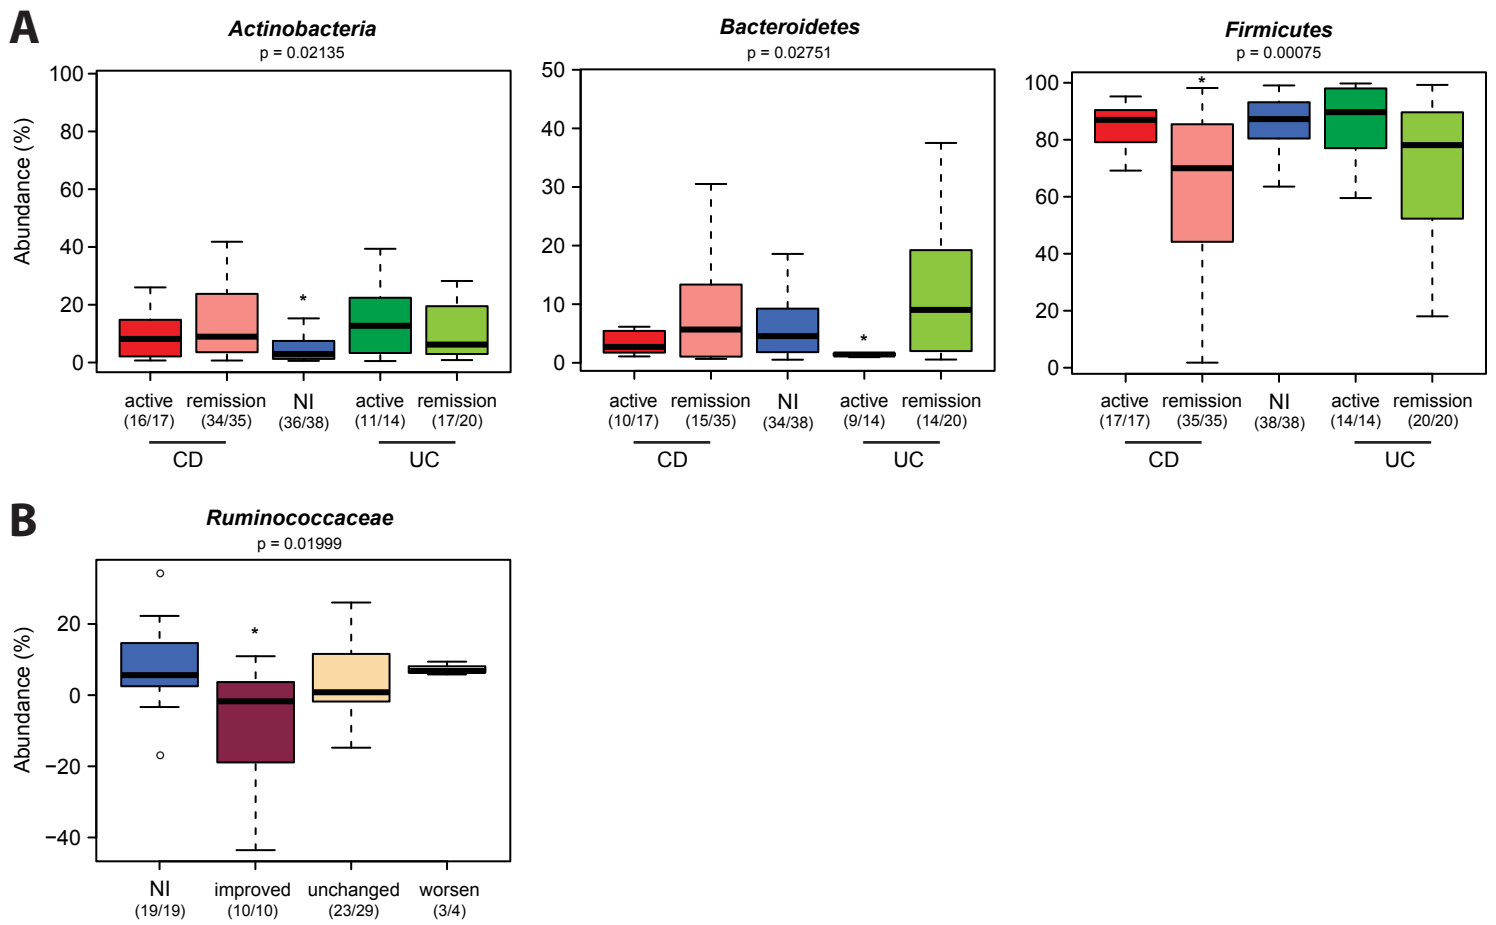

**Supplementary Figure S1:** Boxplots showing sequence abundances of indicated taxonomic groups.

Supplement: gutjnl-2015-309940supp_figure.pdf [file gutjnl-2015-309940supp_figure.pdf]
